# Supplementary material for: Bitter fruits of hard labour: diet metabarcoding and telemetry reveal that urban songbirds travel further for lower-quality food
Source: PubMed Central journal article supplement (PMC7320956; doi:10.1007/s00442-020-04678-w), 2020-06-13
Supplement: 442_2020_4678_MOESM1_ESM.pdf [file 442_2020_4678_MOESM1_ESM.pdf]

## Supplementary Material

### **Bitter fruits of hard labour: Diet metabarcoding and telemetry reveal that urban songbirds travel further for lower-quality food**

Crinan Jarrett, Luke L. Powell, Heather McDevitt, Barbara Helm \* and Andreanna J. Welch \*

\* shared corresponding authors: [b.helm@rug.nl](mailto:b.helm@rug.nl) and [a.j.welch@durham.ac.uk](mailto:a.j.welch@durham.ac.uk)

## Supplementary Methods

### Field data collection and information processing

*Field sites:* Our nestbox set-up was located in the urban Kelvingrove Park in Glasgow (55°52' N, 4°17' W; 71 nestboxes) and in an oak-dominated deciduous woodland surrounding the Scottish Centre for Ecology and the Natural Environment (SCENE), on Loch Lomond, Scotland (56°7.5' N, 4°37' W; 280 nestboxes) (Suppl. Fig. 1). For details, see Pollock et al. (2017) and Møller et al. (2014). We used woodcrete boxes for parids (Schwegler, Germany) with an entrance hole diameter of 32 mm, hung on trees of heights between 150 – 350 cm.

*Tree monitoring:* We surveyed the numbers of oaks and of the second most common deciduous trees in our forest area, birch (*Betula* sp.) in a 35 m radius around the 16 focal nestboxes used for radio-telemetry (henceforth “tracked boxes”). A tape measure was used to measure 35m from the nestbox at intervals of 60° to each other, creating six sectors for ease of counting. All oak and birch trees (>0.5 m circumference at chest height) were identified and counted. All additional trees were counted and classed as “other”. We also collected anecdotal data on invertebrate presence in 1 oak tree and 1 birch per site, as described by Pollock et al. 2017 (Suppl. Fig. 1).

*Avian fieldwork:* Starting on 14th April 2016, we recorded nest building and egg-laying weekly (see Capilla-Lasheras et al. 2017; Jarrett et al. 2017; Pollock et al. 2017). We calculated the earliest possible hatch date by estimating the date of the final egg (assuming one egg/day), and adding 12 days of incubation. From the estimated hatch date we checked nest boxes every second day until hatching occurred (mean hatch date: city = 21<sup>st</sup> May, forest = 24<sup>th</sup> May), distinguishing hatchlings from 1 day old chicks. Hatching day was counted as the first day in the birds' life (i.e. age = 0). Thereafter, remaining eggs and chicks were counted weekly and on day 13 chicks were measured and ringed. We refer to data from this day as “fledgling” data because nestlings by then are fully grown in body mass, and later sampling puts them at risk. To quantify reproductive outcomes, we calculated hatching success as the maximal numbers

of hatchlings/eggs, fledging success as the maximal numbers of fledglings/hatchlings, and used fledging mass (mass on post-hatching day 13) as a proxy for the probability of survival. After fledging, we recorded any dead chicks.

At each site, 8 focal nestboxes were chosen according to their suitability for telemetry, the ideal terrain being as even as possible, with a slight slope and some potential vantage points. One brood in the city died at day 7 of nestlings' lives; for this brood we did not collect nestling mass data, faecal samples or video footage. We caught one of the parents from each nestbox on the 5th (n=9), 6th (n=6) or 7th (n=1) day of the nestlings' lives while it provisioned its brood. The parents were tagged with a radiotransmitter (see below), and weighed, ringed, sexed and aged. Infrared camera systems were installed at each nestbox on day 7 and 11 of the nestlings' life (forest n=8, city n=8; custom-made systems by the University of Glasgow's Bioelectronics Unit; Pollock et al. 2017). On the 13th day of the nestlings' lives, we collected at least two faecal samples per nest. Samples were collected by picking up the chick and immediately holding a vial to its cloaca, in some occasions gently massaging the lower abdomen. Faecal samples were collected in vials containing 1.25ml of 100% ethanol and stored at -20°C during the field-season. Chicks were then weighed, ringed, and a blood-sample taken.

*Telemetry:* We tagged adults with radiotransmitters as described in Nord *et al.* 2016, using PIP31 single celled tag (Biotrack, Dorset, UK; weight 0.35g; maximal dimensions 7x7x4mm; battery type Ag337). Briefly, we trimmed feathers on the birds' lower back and attached a radiotransmitter using eyelash glue (Duo Eyelash Adhesive Clear White, waterproof) and a small amount of superglue. The birds were tracked over the next 1-4 days with Lotek wireless SRX400 receivers and Yagi antennas by two observers (CJ and HM). To triangulate the position of the bird, observers stood at an approximate 90° angle from the estimated bird location and took compass bearings in the estimated direction of the bird every 2 min, for periods of 30 min. The locations where the observers stood were recorded using GPS (Garmin, eTrex 30x). Whenever the bird was seen at any of the 2-min points during the tracking period, a bearing and an estimated distance from the observer were recorded. Observers coordinated their bearings with walkie-talkies, and synched watches. We carried out a total of 3-5 tracking periods of 30 min per bird, recording a total of 666 position fixings spread out across the day. For quality control of the data, the quality of the signal was recorded for each observation, based on the volume and stability of the signal. Categories used to indicate quality were “good” (when there was a steady volume signal with a clear direction), “moving” (when direction was

detectable but volume varied unexpectedly), and “bad” (when signal was faint and direction hard to detect). Any fixes where the signal quality was noted as being “bad” were excluded from analysis; there were more “bad” fixings in the city than the forest (45 and 26 respectively), likely due to interference with buildings. Triangulation calculations were carried out using the Sigloc package (Berg 2015) within R 3.3.1. Once all bird positions had been calculated, points were plotted using Google Earth (version 7.0.2.8415, 2012) and points deemed unlikely based on visual assessment of the bird’s position on the map were eliminated. The criteria used for exclusion were: if the point was a clear outlier compared to the majority of the data, or if the actual location of the bird was considered unrealistic (such as over water or behind rows of buildings). The number of position fixes after cleaning up the data was 570 (city: n=303; forest: n=267). We used the package Geosphere (Hijmans et al. 2012) to calculate foraging distances, considered as the distance (m) between the nestbox and each location of the bird, in a straight line.

*Video recording of parental provisioning:* Infrared camera systems were focused on the entrance hole from inside the nestbox and recorded for 24 hours, starting at approx. 5pm. Four standardised half-hour periods (8:00-8:30 and 19:00-19:30 per sampling day) were extracted for each nestbox using VideoLAN VLC Media Player. From counted parental entries, we calculated provisioning rate as the number of parental entries into the nestbox per half-hour period.

We classified provisioned prey items into two categories: caterpillars and non-lepidopteran invertebrates. Where possible we identified invertebrates to family level (e.g. aphids). We were unable to identify 16% ( $0.16 \pm 0.17$ ) of all items delivered, with no bias for site ( $p > 0.05$ ). These items were discarded for analysis. For each half-hour period of footage, the number of items from each category delivered was divided by the total number of visits to obtain proportions of visits. The dimensions of the caterpillars delivered was estimated by obtaining total length ( $L$ ) and mean width ( $W$ ) using the diameter of the nest hole as a reference, and the formula  $(\pi/4) * L * W^2$  (Blondel et al. 1991) to calculate the volume.

#### Metabarcoding and bioinformatics

*PCR.* PCRs were conducted in 15 $\mu$ L reactions containing 1X Multiplex PCR Mastermix (Qiagen), 0.13 $\mu$ M of each primer, and 3 $\mu$ L DNA extract. PCR thermocycling conditions followed an initial denaturation of 95°C for 5 min; 35 cycles of 95°C for 30 sec, 50°C for 1 min, and 72°C for 30 sec; and a final extension of 68°C for 10 min. For rbcL, multiplexed PCR

amplification was conducted by simultaneously using all three primer pairs with the same mastermix and thermal cycling protocols as described above. PCR was conducted up to seven times for each locus, with results examined on 2% agarose gels stained with ethidium bromide, until three positive PCR products were obtained.

*Library construction and validation.* After cleaning and pooling the PCR products as indicated in the main text, a dual indexing PCR was performed: 50 $\mu$ L reactions contained 1x HIFI Master Mix (KAPA), 0.5 $\mu$ M of each indexed primer, and 10 $\mu$ L bead cleaned PCR product. The thermal cycling conditions were: 72°C for 3 min; 98°C for 30 sec; 12 cycles of 98°C for 10 sec, 63°C for 30 sec, followed by 72°C for 3 min. Reactions were cleaned, quantified using the Qubit High Sensitivity DNA assay, and then pooled in equimolar ratios. The sequencing pool was analysed on a 2100 Bioanalyzer (Agilent Technologies) using the high sensitivity DNA kit. The final pool concentration was determined via quantitative PCR with the KAPA Library Quantitative Kit.

*Bioinformatics.* Unless otherwise specified, default parameters were employed. Raw sequences were analysed using FastQC (Andrews et al. 2011) and adapters were trimmed using CutAdapt v1.10 (Martin 2011). Following Schirmer et al. (2015), quality trimming was conducted using Sickel v1.33 (Joshi & Fass 2011) with the  $-x$  option to prevent 5' trimming (Joshi & Fass 2011). Then error correction was performed using BayesHammer (Nikolenko et al. 2013) through the SPAdes program v3.10.1 (Bankevich et al. 2012), and reads were merged using PEAR v0.9.6. (Zhang et al. 2014). Data for each primer set were split using a custom python script and PCR primers were trimmed off using CutAdapt. For the COI dataset, we filtered non-target sequences (e.g. those potentially belonging to the birds or humans) using BLAST: first, identical reads for each sample were collapsed using the obiuniq function in obitools (Boyer *et al.* 2016), while retaining the read counts. They were then queried against the curated COI Midori-LONGEST database (Machida et al. 2017) using blastn in BLAST+ v2.6.0. A custom python script was used to retain reads, and associated abundance information, for which the best match (based on bitscore) was classified as belonging to phylum Arthropoda, the alignment was  $\geq 50\%$  the length of the query sequence, and the e-value was  $\leq 10^{-5}$ . The data were then filtered for chimeric sequences using usearch v11.0.667 (Edgar 2010) implemented through a modified version of the program DAME (Zepeda-Mendoza et al. 2016) available at <https://github.com/shyamsg/DAME>. The DAME script convertToUsearch.py was used prepare

for OTU clustering, and to filter sequences  $\pm 30$ bp of the target sequence length (without primers).

*OTU clustering and taxonomy assignment.* As discussed by Clare et al. (2011) and outlined by Razgour et al. (2011), we tested OTU clustering similarity thresholds from 94 – 100%, and used plots to identify the best threshold (97%) where over- and under-splitting were minimized (Krüger et al. 2014; Trevelline et al. 2016). We used the `tabulateSumacust.py` script from the DAME package to make OTU tables, retaining only OTUs with  $\geq 5$  sequences. To assign taxonomy, we used a BLAST search of the Genbank NT database: Using `blastn` in BLAST+ 2.7.1 we retrieved the best 20 matches for each representative OTU sequence. Using custom python and R scripts (Alberdi et al. 2018; Aizpurua et al. 2018), we retained the highest common taxonomic information among matches with the maximum bitscore, and assigned taxonomy to each OTU based on identity: For matches with  $\geq 95\%$  identity we assigned order-level taxonomy;  $\geq 96.5\%$  we assigned family-level, and for  $\geq 98\%$  we assigned genus and species-level taxonomy.

## References

- Aizpurua, O., Budinski, I., Georgiakakis, P., Gopalakrishnan, S., Ibañez, C., Mata, V. *et al.* (2018). Agriculture shapes the trophic niche of a bat preying on multiple pest arthropods across Europe: Evidence from DNA metabarcoding. *Mol. Ecol.*, 27, 815-825.
- Alberdi, A., Aizpurua, O., Gilbert, M.T.P. & Bohmann, K. (2018). Scrutinizing key steps for reliable metabarcoding of environmental samples. *Methods Ecol.Evol.*, 9, 134-147.
- Andrews, S., Lindenbaum, P., Howard, B. & Ewels, P. (2011). FastQC: a quality control tool for high throughput sequence data.
- Bankevich, A., Nurk, S., Antipov, D., Gurevich, A.A., Dvorkin, M., Kulikov, A.S. *et al.* (2012). SPAdes: A New Genome Assembly Algorithm and Its Applications to Single-Cell Sequencing. *Journal of Computational Biology*, 19, 455-477.
- Berg, S.S. (2015). The Package “sigloc” for the R Software: A Tool for Triangulating Transmitter Locations in Ground-Based Telemetry Studies of Wildlife Populations. *Bull. Ecol. Soc. Am.*, 96, 500-507.
- Blondel, J., Dervieux, A., Maistre, M. & Perret, P. (1991). Feeding ecology and life history variation of the blue tit in Mediterranean deciduous and sclerophyllous habitats.

*Oecologia*, 88, 9–14.

- Boyer, F., Mercier, C., Bonin, A., Le Bras, Y., Taberlet, P. & Coissac, E. (2016). Obitools: a unix-inspired software package for DNA metabarcoding. *Mol. Ecol. Resour.*, 16, 176-182.
- Capilla-Lasheras, P., Dominoni, D.M., Babayan, S.A., O’Shaughnessy, P.J., Mladenova, M., Woodford, L., *et al.* (2017). Elevated immune gene expression is associated with poor reproductive success of urban blue tits. *Front. Ecol. Evol.*, 5, 64.
- Clare, E.L., Barber, B.R., Sweeney, B.W., Hebert, P.D.N. & Fenton, M.B. (2011). Eating local: influences of habitat on the diet of little brown bats (*Myotis lucifugus*). *Mol. Ecol.*, 20, 1772-1780.
- Edgar, R.C. (2010). Search and clustering orders of magnitude faster than BLAST. *Bioinformatics*, 26, 2460-2461.
- Hijmans, R.J., Williams, E. & Vennes, C. (2012). Geosphere: spherical trigonometry. *R package version*, 1, 2-28.
- Jarrett, C., Maillard, F. & Helm, B. (2017). Seasonal trends in the temporal plasticity of breeding in blue tits and great tits in the Loch Lomond area. *Glas. Nat.*, 26.
- Joshi, N.A. & Fass, J.N. (2011). Sickle: a sliding-window, adaptive, quality-based trimming tool for FastQ files.
- Krüger, F., Clare, E.L., Greif, S., Siemers, B.M., Symondson, W.O.C. & Sommer, R.S. (2014). An integrative approach to detect subtle trophic niche differentiation in the sympatric trawling bat species *Myotis dasycneme* and *Myotis daubentonii*. *Mol. Ecol.*, 23, 3657-3671.
- Machida, R.J., Leray, M., Ho, S-L. & Knowlton, N. (2017). Metazoan mitochondrial gene sequence reference datasets for taxonomic assignment of environmental samples. *Scientific Data*, 4, 170027.
- Martin, M. (2011). Cutadapt removes adapter sequences from high-throughput sequencing reads. *EMBnet.journal*, 17, 10-12.
- Møller, A. P., Adriaensen, F., Artyemyev, A., Bañbura, J., Barba, E. & Biard, C. (2014). Clutch-size variation in Western Palaearctic secondary hole-nesting passerine birds in relation to nest box design. *Methods Ecol. Evol.*, 5, 353-362.
- Nikolenko, S.I., Korobeynikov, A.I. & Alekseyev, M.A. (2013). BayesHammer: Bayesian clustering for error correction in single-cell sequencing. *BMC Genomics*, 14(Suppl 1), S7.
- Nord, A., Lehmann, M., MacLeod, R., McCafferty, D.J., Nager, R.G., Nilsson, J.-Å., *et al.*

- (2016). Evaluation of two methods for minimally invasive peripheral body temperature measurement in birds. *J. Avian Biol.*, 47, 417–427.
- Pollock, C.J., Capilla-Lasheras, P., McGill, R., Helm, B. & Dominoni, D.M. (2017). Integrated behavioural and stable isotope data reveal altered diet linked to low breeding success in urban-dwelling blue tits (*Cyanistes caeruleus*). *Sci. Rep.*, 7, 5014.
- Razgour, O., Clare, E.L., Zeale, M.R.K., Hanmer, J., Bærholm Schnell, I., Rasmussen, M. *et al.* (2011). High-throughput sequencing offers insight into mechanisms of resource partitioning in cryptic bat species. *Ecol. Evol.*, 1, 556-570.
- Schirmer, M., Ijaz, U.Z., D’Amore R, Hall N, Sloan WT, Quince C (2015) Insight into biases and sequencing errors for amplicon sequencing with the Illumina MiSeq platform. *Nucleic Acids Research*, 43, e37.
- Trevelline, B.K., Latta, S.C., Marshall, L.C., Nuttle, T., Porter, B.A. (2016). Molecular analysis of nestling diet in a long-distance Neotropical migrant, the Louisiana Waterthrush (*Parkesia motacilla*). *Auk*, 133, 415-428.
- Zepeda-Mendoza, M.L., Bohmann, K., Baez, A.C. and Gilbert, M.T.P., 2016. DAME: a toolkit for the initial processing of datasets with PCR replicates of double-tagged amplicons for DNA metabarcoding analyses. *BMC research notes*, 9(1), 255.
- Zhang, J., Kobert, K., Flouri, T., Stamatakis, A. (2014). PEAR: a fast and accurate Illumina Paired-End reAd mergeR. *Bioinformatics*, 30(5), 614-620.

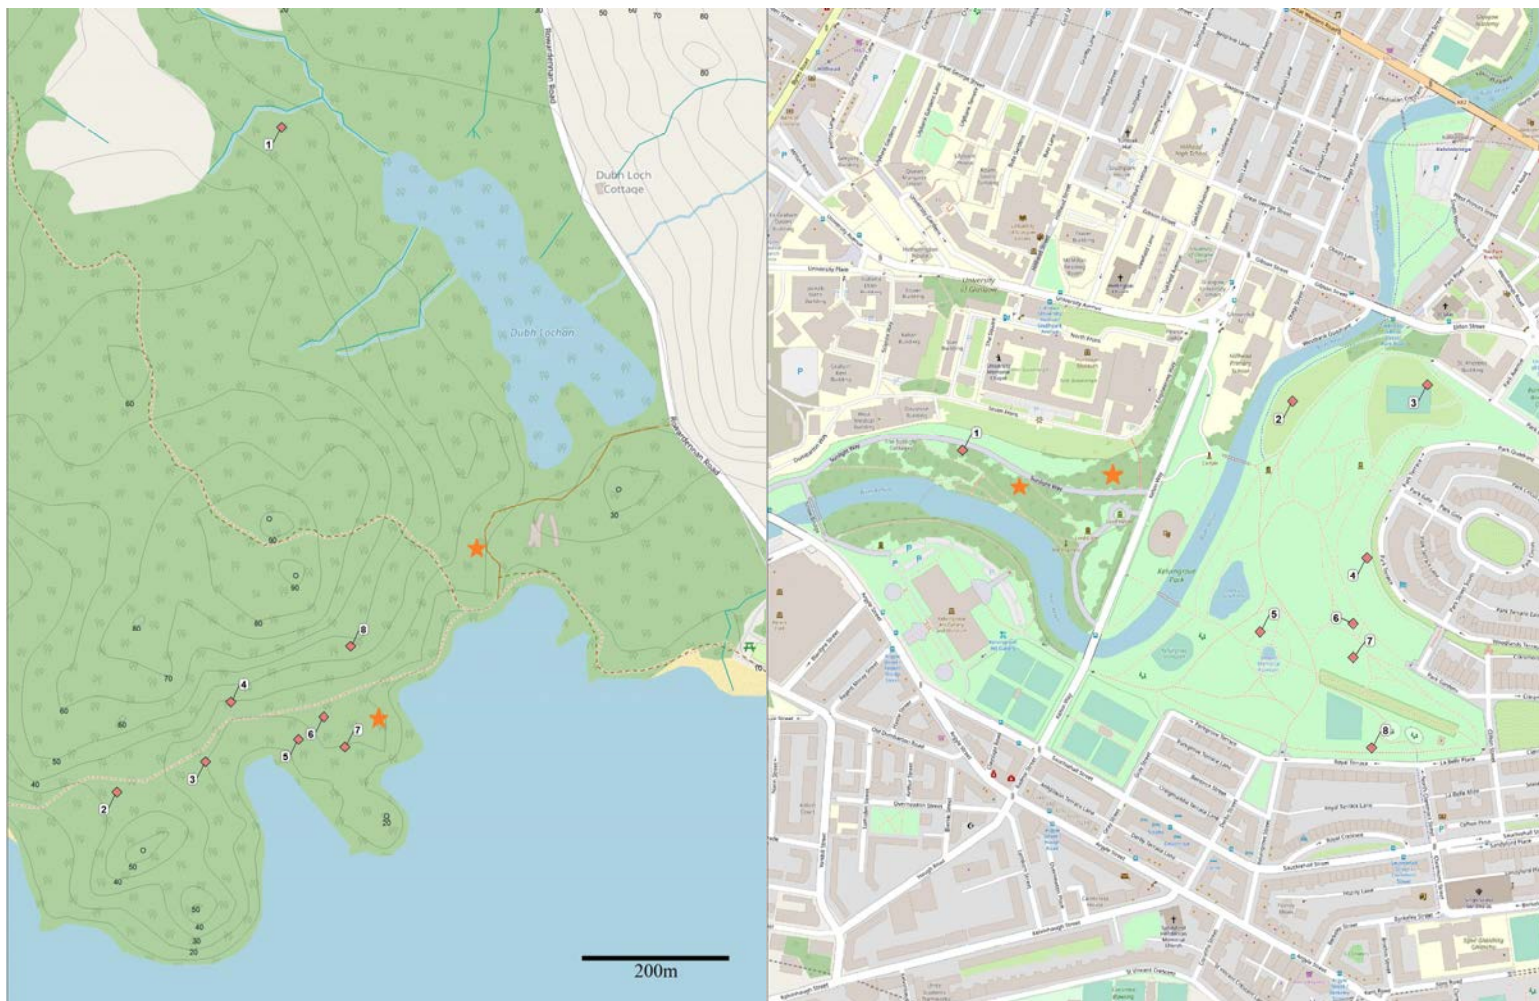

**Suppl. Fig. 1.** Map of forest site (left) and city site (right). Nestbox locations are indicated by small red squares, and trees used for invertebrate sampling (Jarrett et al., unpubl. data) are indicated with orange stars. Dark green indicates non-coniferous forest, light green is managed lawn.



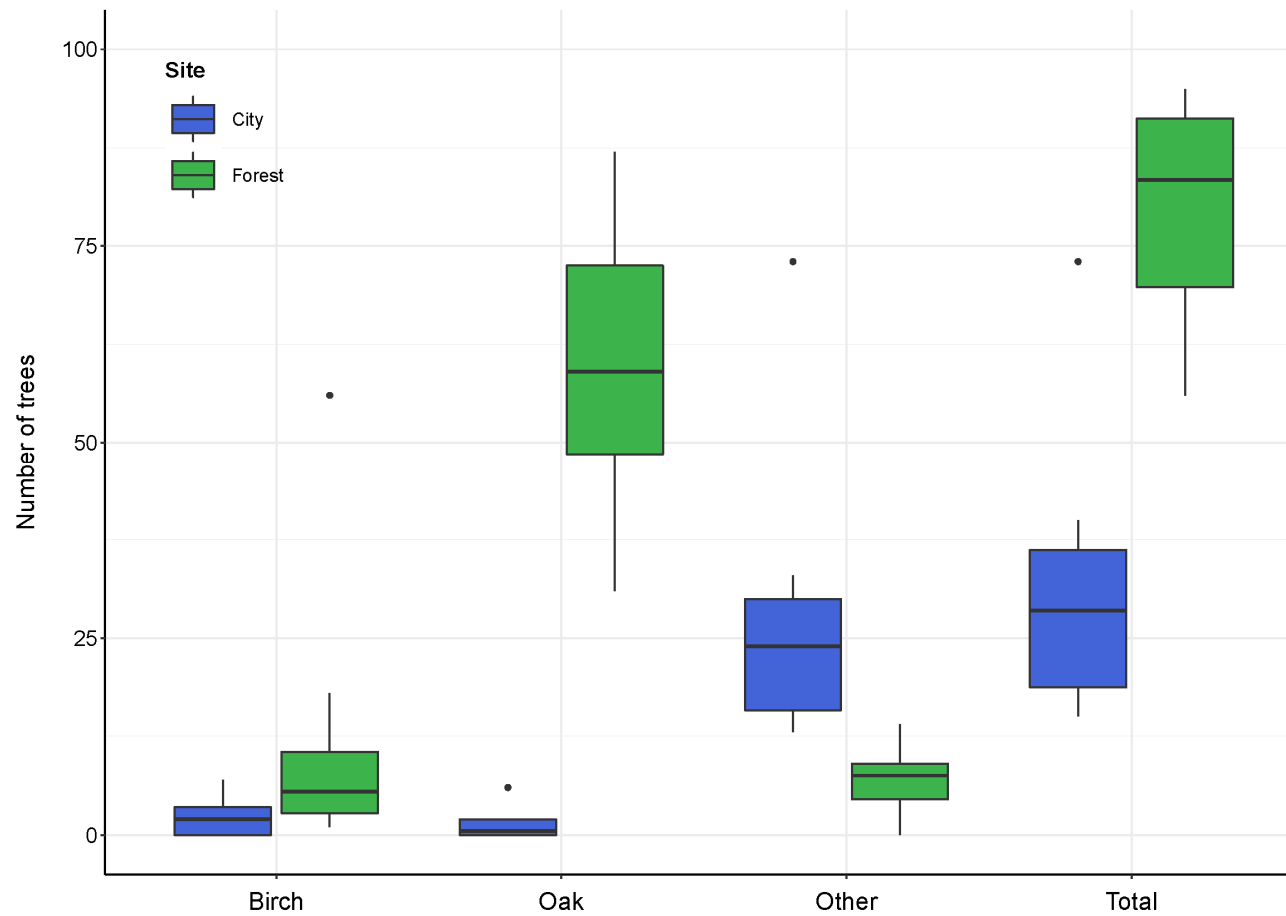

**Suppl. Fig. 2.** Number of oaks (*Quercus* sp.), birch (*Betula* sp.), other tree species, and total trees in a 35m radius around tracked boxes in the city (blue) and the forest (green). The bold line within each box indicates the median value; the lower and upper limits of the boxes represent the second and third quartiles respectively; and the lines extend to the farthest outliers within 1.5 times the interquartile range.

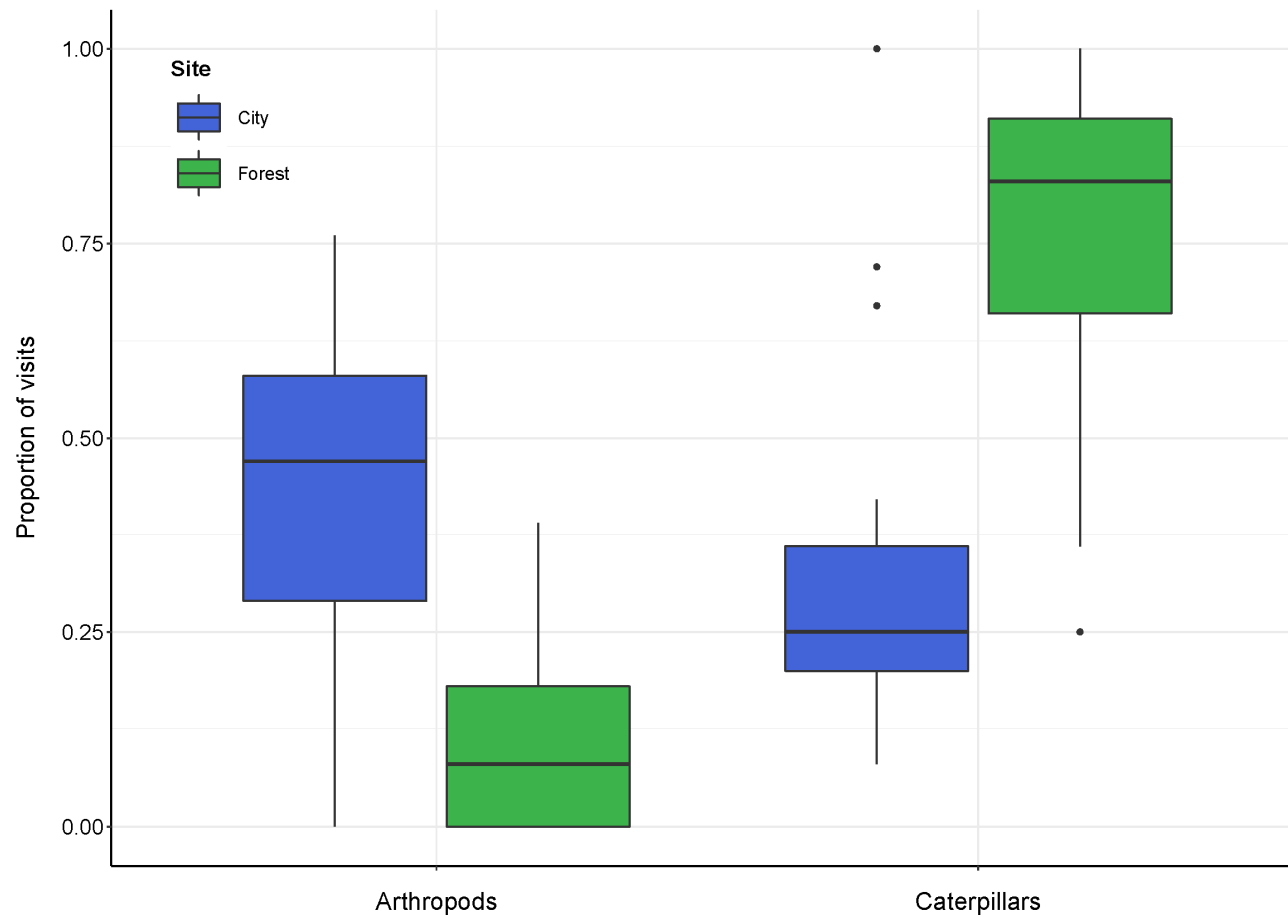

**Suppl. Fig. 3.** Proportion of visits performed by parents in the city (blue) and the forest (green) in which caterpillars and other arthropods (excluding caterpillars) were delivered to nestlings.

**Table S1.** Primer sequences used for DNA metabarcoding. The ZBJ-Art primers target the arthropod COI gene, while the rbcL primers target different regions of the plant chloroplast rbcL gene.

| <b>Primer</b> | <b>Sequence (5' – 3')*</b>                                             | <b>Reference</b>    |
|---------------|------------------------------------------------------------------------|---------------------|
| ZBJ-ArtF1c    | <b>TCGTCGGCAGCGTCAGATGTGTATAAGAGACAG</b> AGATATTGGAACWTTATATTTTATTTTGG | Zeale et al. (2011) |
| ZBJ-ArtR2c    | <b>GTCTCGTGGGCTCGGAGATGTGTATAAGAGACAG</b> WACTAATCAATTWCCAAATCCTCC     | Zeale et al. (2011) |
| rbcL3         | <b>TCGTCGGCAGCGTCAGATGTGTATAAGAGACAG</b> CTAAATTGGGATTATCCGCT          | This study          |
| rbcL4         | <b>GTCTCGTGGGCTCGGAGATGTGTATAAGAGACAG</b> AGCGGTCTCTCCAACGCATA         | This study          |
| rbcL5         | <b>TCGTCGGCAGCGTCAGATGTGTATAAGAGACAG</b> TTCACTCAAGATTGGGTTTCT         | This study          |
| rbcL6         | <b>GTCTCGTGGGCTCGGAGATGTGTATAAGAGACAG</b> ATTTCCCAAGGGTGCCTA           | This study          |
| rbcL7         | <b>TCGTCGGCAGCGTCAGATGTGTATAAGAGACAG</b> CTCCTGAATATGAAACCAAAGA        | This study          |
| rbcL8         | <b>GTCTCGTGGGCTCGGAGATGTGTATAAGAGACAG</b> GTAGCAGGCCCTTTGTAAC          | This study          |

\*Bold indicates Illumina adapter overhang

**Table S2.** Explanatory variables used in full models for analyses, from which we performed model selection by deletion of non-significant variables identified through likelihood ratio tests (LRTs). In the cases where the full model contains only one explanatory variable, we performed LRT tests against the null model. The symbol \* between two variables represents an interaction term, and random effects are expressed as (1|Random effect).

| Response variable                                    | Type of model         | Explanatory variables                                                                                             |
|------------------------------------------------------|-----------------------|-------------------------------------------------------------------------------------------------------------------|
| Tree density                                         | Negative Binomial GLM | Site                                                                                                              |
| Oak density                                          | Negative Binomial GLM | Site                                                                                                              |
| Birch density                                        | Negative Binomial GLM | Site                                                                                                              |
| Other tree density                                   | Negative Binomial GLM | Site                                                                                                              |
| Proportion of OTUs of Arthropod orders               | LMM                   | Site + date + site*date + (1 nestbox)                                                                             |
| Proportion of OTUs of Plant orders                   | LMM                   | Site + date + site*date + (1 nestbox)                                                                             |
| Provisioning rate per nest and per nestling          | LMM                   | Site + time + date + nestling age + (1 nestbox)                                                                   |
| Dietary items provisioned (proportions from footage) | LMM                   | Site + time + date + nestling age + (1 nestbox)                                                                   |
| Volume of delivered caterpillars (footage)           | LMM                   | Site + time + date + nestling age + (1 nestbox)                                                                   |
| Foraging distance                                    | LMM                   | Site + time + sex + number of hatchlings + nestling age + tree density + site* number of hatchlings + (1 nestbox) |
| Caterpillar biomass delivered                        | LMM                   | Site + time + site*foraging distance + (1 nestbox)                                                                |
| Clutch size & number of fledglings                   | Poisson GLM           | Site + date of first egg                                                                                          |
| Hatching success & fledging success                  | Binomial GLM          | Site + date of first egg                                                                                          |
| Adult body mass                                      | Gaussian GLM          | Site + sex                                                                                                        |
| Nestling body mass (a)                               | LMM                   | Site + number of hatchlings + hatch date + (1 nestbox)                                                            |
| Nestling body mass (b)                               | LMM                   | Proportion of delivered caterpillars + number of hatchlings + hatch date + (1 nestbox) + (1 site)                 |

**Table S3:** Summary models of comparisons between an urban and forest site. Shown are minimal adequate models after elimination of non-significant factors, while however retaining site in every model. Table details analyses of a) tree community composition, b) foraging distance, c) video-recorded provisioning, d) faecal metabarcoding, and reproductive outcomes for e) non-tracked boxes and f) tracked boxes. Reference levels are: urban (for site), female for sex, and evening (for time).

a) Tree community composition

| Response variable | Explanatory variable | Estimate | Std.Error | t value | p value          |
|-------------------|----------------------|----------|-----------|---------|------------------|
| Total trees       | Intercept            | 3.46     | 0.12      | 26.75   | <2E-16           |
|                   | Site                 | 0.9      | 0.17      | 5.1     | <b>3.39E-07</b>  |
| Oak               | Intercept            | 0.31     | 0.3       | 0.99    | 0.32             |
|                   | Site                 | 3.77     | 0.34      | 11.09   | <b>&lt;2E-16</b> |
| Birch             | Intercept            | 0.86     | 0.44      | 1.92    | 5.00E-02         |
|                   | Site                 | 1.65     | 0.6       | 2.74    | <b>6.00E-03</b>  |
| Other trees       | Intercept            | 3.34     | 0.23      | 12.41   | <2E-16           |
|                   | Site                 | -1.41    | 0.34      | -4.06   | <b>4.77E-05</b>  |

b) Foraging distance

| Response variable | Explanatory variable | Estimate | Std.Error | Df     | t value | p value     |
|-------------------|----------------------|----------|-----------|--------|---------|-------------|
| Foraging distance | Intercept            | 32.1     | 25.9      | 15.6   | -1.7    | 0.1         |
|                   | Site                 | -17.75   | 6.69      | 12.21  | -2.65   | <b>0.02</b> |
|                   | Sex                  | 17.88    | 6.61      | 11.66  | 2.7     | <b>0.03</b> |
|                   | Nestling age         | 2.55     | 0.86      | 504.68 | 2.94    | <b>0.01</b> |
|                   | Number of hatchlings | 6.98     | 2.78      | 13.91  | 2.5     | <b>0.05</b> |

c) Video-recorded provisioning

| Response variable                | Explanatory variable | Estimate | Std.Error | Df    | t value | p value         |
|----------------------------------|----------------------|----------|-----------|-------|---------|-----------------|
| Visits per nest                  | Intercept            | 29.88    | 2.18      | 19.15 | 13.64   | 2.56E-11        |
|                                  | Time                 | -16.5    | 2.27      | 33.48 | -7.25   | <b>2.32E-08</b> |
|                                  | Site                 | 1.16     | 3.34      | 9.97  | 0.35    | 0.73            |
| Visits per nestling (log)        | Intercept            | 1.53     | 0.07      | 26.39 | 21.45   | <2E-16          |
|                                  | Time                 | -0.6     | 0.09      | 32.67 | -6.77   | <b>1.08E-07</b> |
|                                  | Site                 | -0.06    | 0.16      | 14.66 | -0.4    | 0.69            |
| Proportion of caterpillars (log) | Intercept            | 0.27     | 0.03      | 11.82 | 7.95    | 4.41E-06        |
|                                  | Site                 | 0.28     | 0.05      | 12.14 | 5.95    | <b>6.39E-05</b> |
| Proportion of arthropods (log)   | Intercept            | 0.33     | 0.04      | 9.4   | 9.44    | 4.25E-06        |
|                                  | Site                 | -0.22    | 0.05      | 9.64  | -4.51   | <b>0.001</b>    |

|                                                               |                        |        |       |       |       |                 |
|---------------------------------------------------------------|------------------------|--------|-------|-------|-------|-----------------|
| Mean caterpillar volume                                       |                        |        |       |       |       |                 |
|                                                               | Intercept              | 4.11   | 0.14  | 11.96 | 28.44 | 2.33E-12        |
|                                                               | Site                   | 0.59   | 0.2   | 11.91 | 2.94  | <b>0.01</b>     |
| <b>Dependence of caterpillar biomass on foraging distance</b> |                        |        |       |       |       |                 |
|                                                               | Intercept              | 590.4  | 460.8 | 8.4   | 1.3   | 0.2             |
|                                                               | Site                   | -210.4 | 800   | 5.7   | -0.26 | 0.8             |
|                                                               | Foraging distance      | 5.6    | 11.3  | 8.3   | 0.5   | 0.6             |
|                                                               | Site*Foraging distance | 54.8   | 24.5  | 6.4   | 2.2   | <b>0.04</b>     |
|                                                               | Time                   | -0.45  | 0.1   | 33.82 | -4.26 | <b>3.60E-04</b> |

d) Faecal metabarcoding

| Response variable         | Explanatory variable | Estimate  | Std.Error | t value | p value         |
|---------------------------|----------------------|-----------|-----------|---------|-----------------|
| Proportion Lepidoptera    |                      |           |           |         |                 |
|                           | Intercept            | 0.93      | 0.25      | 3.64    | 0.002           |
|                           | Site                 | 0.44      | 0.05      | 7.76    | <b>1.93E-06</b> |
|                           | Date                 | -0.007    | 0.0004    | -1.85   | 0.08            |
| Proportion Diptera        |                      |           |           |         |                 |
|                           | Intercept            | -0.2      | 0.21      | -0.95   | 0.35            |
|                           | Site                 | -0.23     | 0.04      | -4.99   | <b>1.95E-04</b> |
|                           | Date                 | 0.007     | 0.003     | 2.07    | <b>0.05</b>     |
| Proportion Coleoptera     |                      |           |           |         |                 |
|                           | Intercept            | 0.13      | 0.01      | 10.33   | 3.24E-08        |
|                           | Site                 | -0.09     | 0.02      | -4.66   | <b>3.03E-04</b> |
| Proportion Hemiptera      |                      |           |           |         |                 |
|                           | Intercept            | 0.42      | 0.07      | 5.59    | 8.76E-05        |
|                           | Site*Date            | 0.008     | 0.004     | 2.09    | <b>0.05</b>     |
|                           | Date                 | -0.006    | 0.001     | -4.74   | <b>3.82E-04</b> |
|                           | Site                 | -0.6      | 0.27      | -2.16   | <b>0.04</b>     |
| Proportion Hymenoptera    |                      |           |           |         |                 |
|                           | Intercept            | -0.18     | 0.04      | -4.53   | 4.67E-04        |
|                           | Site                 | -0.03     | 0.009     | -4.23   | <b>8.38E-04</b> |
|                           | Date                 | 0.003     | 0.0006    | 5.17    | <b>1.40E-04</b> |
| Proportion Plecoptera     |                      |           |           |         |                 |
|                           | Intercept            | 0.16      | 0.07      | 2.13    | 0.04            |
|                           | Date                 | -0.002    | 0.001     | -1.93   | <b>0.07</b>     |
|                           | Site                 | -9.78E-05 | 1.94E-02  | -0.005  | 0.99            |
| Proportion Araneae        |                      |           |           |         |                 |
|                           | Intercept            | 0.04      | 0.01      | 3.86    | 0.001           |
|                           | Site                 | -0.008    | 0.01      | -0.47   | 0.64            |
| Proportion Ephemeroptera  |                      |           |           |         |                 |
|                           | Intercept            | 0.004     | 0.003     | 1.29    | 0.21            |
|                           | Site                 | -0.004    | 0.004     | -0.82   | 0.42            |
| Proportion Sarcoptiformes |                      |           |           |         |                 |
|                           | Intercept            | 0.007     | 0.005     | 1.27    | 0.22            |
|                           | Site                 | -0.005    | 0.008     | -0.59   | 0.55            |
| Order Fagales             |                      |           |           |         |                 |
|                           | Intercept            | 0.17      | 0.05      | 3.04    | 0.008           |
|                           | Site                 | 0.3       | 0.08      | 3.46    | <b>0.003</b>    |
| Order Rosales             |                      |           |           |         |                 |

|           |      |      |      |             |
|-----------|------|------|------|-------------|
| Intercept | 0.23 | 0.05 | 4.29 | 6.37E-04    |
| Site      | 0.15 | 0.08 | 1.82 | <b>0.08</b> |

e) Reproductive Outcomes (non-tracked boxes)

| Response variable                  | Explanatory variable | Estimate | Std.Error | z value | p value         |
|------------------------------------|----------------------|----------|-----------|---------|-----------------|
| Clutch size (Poisson GLM)          |                      |          |           |         |                 |
|                                    | Intercept            | 2.42     | 0.17      | 14.61   | <2E-16          |
|                                    | Site                 | 0.26     | 0.07      | 3.53    | <b>4.09E-04</b> |
|                                    | Laying date          | -0.01    | 0.01      | -2.57   | <b>0.01</b>     |
| Hatching success (Binomial GLM)    |                      |          |           |         |                 |
|                                    | Intercept            | -0.23    | 0.04      | -5.30   | 1.13E-07        |
|                                    | Site                 | 0.12     | 0.11      | 1.12    | 0.26            |
| Fledging success (Binomial GLM)    |                      |          |           |         |                 |
|                                    | Intercept            | -0.25    | 0.11      | -2.15   | 0.03            |
|                                    | Site                 | 0.15     | 0.13      | 1.23    | 0.22            |
| No. of fledglings (Poisson GLM)    |                      |          |           |         |                 |
|                                    | Intercept            | 1.95     | 0.20      | 9.55    | 1.28E-21        |
|                                    | Site                 | 0.54     | 0.09      | 5.73    | <b>1.02E-08</b> |
|                                    | First egg            | -0.02    | 0.01      | -2.69   | <b>0.01</b>     |
| Nestling body mass at day 13 (LMM) |                      |          |           |         |                 |
|                                    | Intercept            | 11.00    | 0.28      | 39.47   | 2.00E-16        |
|                                    | Site                 | 0.52     | 0.34      | 25.70   | 0.14            |

f) Reproductive Outcomes (tracked boxes)

| Response variable                  | Explanatory variable                    | Estimate | Std.Error | z value | p value         |
|------------------------------------|-----------------------------------------|----------|-----------|---------|-----------------|
| Clutch size (Poisson GLM)          |                                         |          |           |         |                 |
|                                    | Intercept                               | 2.12     | 0.12      | 17.39   | <2E-16          |
|                                    | Site                                    | 0.13     | 0.16      | 0.83    | 0.4             |
| Hatching success (Binomial GLM)    |                                         |          |           |         |                 |
|                                    | Intercept                               | -0.33    | 0.53      | -0.63   | 0.52            |
|                                    | Site                                    | -0.04    | 0.29      | -0.15   | 0.88            |
| Fledging success (Binomial GLM)    |                                         |          |           |         |                 |
|                                    | Intercept                               | -0.2     | 0.57      | -0.36   | 0.72            |
|                                    | Site                                    | -0.07    | 0.32      | -0.23   | 0.82            |
| No. of fledglings (Poisson GLM)    |                                         |          |           |         |                 |
|                                    | Intercept                               | 1.85     | 0.14      | 13.22   | <2E-16          |
|                                    | Site                                    | 0.11     | 0.19      | 0.57    | 0.56            |
| Adult body mass (Gaussian GLM)     |                                         |          |           |         |                 |
|                                    | Intercept                               | 11.06    | 0.13      | 83.14   | 2.89E-20        |
|                                    | Site                                    | -0.15    | 0.27      | -0.56   | 0.58            |
| Nestling body mass at day 13 (LMM) |                                         |          |           |         |                 |
|                                    | Intercept                               | 9.97     | 0.22      | 45.16   | 1.3E-13         |
|                                    | Site                                    | 0.87     | 0.32      | 2.67    | <b>0.02</b>     |
|                                    | Hatch date (quadratic)                  | -6.33    | 1.37      | -4.63   | <b>7.48E-04</b> |
| Nestling body mass at day 13 (LMM) |                                         |          |           |         |                 |
|                                    | Intercept                               | 9.33     | 0.52      | 17.62   | 0.09            |
|                                    | Proportion of visits with caterpillars* | 2.2      | 0.87      | 2.52    | 0.23            |

**Table S4.** Taxonomic assignment of all OTUs from nestling faecal samples in the city (blue) and the forest (green). Number of OTU reads refers to the total reads per site (all individuals pooled). OTUs are ordered by decreasing number of reads in the forest.

| Phylum       | Class      | Order       | Family        | Genus        | Species                        | Number of reads |       |
|--------------|------------|-------------|---------------|--------------|--------------------------------|-----------------|-------|
| Arthropoda   | Insecta    | Lepidoptera | Geometridae   | Hydriomena   | <i>Hydriomena furcata</i>      | 13              | 25091 |
| Arthropoda   | Insecta    | Lepidoptera | Geometridae   | Operophtera  | <i>Operophtera brumata</i>     | 3               | 18389 |
| Streptophyta | Unassigned | Unassigned  | Unassigned    | Unassigned   | Unassigned                     | 19466           | 9302  |
| Arthropoda   | Insecta    | Lepidoptera | Geometridae   | Operophtera  | <i>Operophtera fagata</i>      | 0               | 6019  |
| Arthropoda   | Insecta    | Lepidoptera | Geometridae   | Erannis      | <i>Erannis defoliaria</i>      | 12              | 4310  |
| Arthropoda   | Insecta    | Lepidoptera | Noctuidae     | Cosmia       | <i>Cosmia trapezina</i>        | 8166            | 4227  |
| Arthropoda   | Insecta    | Lepidoptera | Geometridae   | Agriopis     | <i>Agriopis leucophaearia</i>  | 0               | 4083  |
| Arthropoda   | Insecta    | Lepidoptera | Noctuidae     | Brachylochia | <i>Brachylochia viminalis</i>  | 1               | 3702  |
| Streptophyta | Unassigned | Rosales     | Rosaceae      | Unassigned   | Unassigned                     | 7382            | 2461  |
| Arthropoda   | Insecta    | Lepidoptera | Geometridae   | Apocheima    | <i>Apocheima pilosaria</i>     | 3031            | 1401  |
| Arthropoda   | Insecta    | Lepidoptera | Ypsolophidae  | Ypsolopha    | <i>Ypsolopha ustella</i>       | 1               | 1140  |
| Arthropoda   | Insecta    | Lepidoptera | Tortricidae   | Acleris      | <i>Acleris rhombana</i>        | 0               | 920   |
| Arthropoda   | Insecta    | Lepidoptera | Tortricidae   | Tortrix      | <i>Tortrix viridana</i>        | 1               | 902   |
| Arthropoda   | Arachnida  | Araneae     | Anyphaenidae  | Anyphaena    | <i>Anyphaena accentuata</i>    | 0               | 763   |
| Arthropoda   | Insecta    | Lepidoptera | Ypsolophidae  | Ypsolopha    | <i>Ypsolopha parenthesella</i> | 0               | 635   |
| Arthropoda   | Insecta    | Lepidoptera | Geometridae   | Agriopis     | <i>Agriopis marginaria</i>     | 0               | 514   |
| Arthropoda   | Insecta    | Lepidoptera | Lycaenidae    | Quercusia    | <i>Quercusia quercus</i>       | 0               | 411   |
| Arthropoda   | Insecta    | Lepidoptera | Geometridae   | Agriopis     | <i>Agriopis aurantiaria</i>    | 0               | 122   |
| Streptophyta | Unassigned | Fagales     | Fagaceae      | Unassigned   | Unassigned                     | 717             | 110   |
| Arthropoda   | Insecta    | Lepidoptera | Geometridae   | Erannis      | <i>Erannis defoliaria</i>      | 0               | 100   |
| Arthropoda   | Insecta    | Lepidoptera | Oecophoridae  | Diurnea      | <i>Diurnea lipsiella</i>       | 0               | 92    |
| Arthropoda   | Insecta    | Coleoptera  | Tenebrionidae | Tenebrio     | <i>Tenebrio molitor</i>        | 505             | 90    |
| Arthropoda   | Insecta    | Lepidoptera | Geometridae   | Eupithecia   | <i>Eupithecia abbreviata</i>   | 0               | 83    |
| Arthropoda   | Insecta    | Diptera     | Tachinidae    | Lypha        | <i>Lypha dubia</i>             | 0               | 55    |
| Arthropoda   | Insecta    | Lepidoptera | Geometridae   | Operophtera  | <i>Operophtera brumata</i>     | 0               | 55    |
| Arthropoda   | Insecta    | Coleoptera  | Curculionidae | Phyllobius   | <i>Phyllobius oblongus</i>     | 40              | 53    |
| Arthropoda   | Insecta    | Lepidoptera | Noctuidae     | Cosmia       | <i>Cosmia trapezina</i>        | 3               | 48    |
| Arthropoda   | Insecta    | Lepidoptera | Unassigned    | Unassigned   | Unassigned                     | 0               | 45    |



| Phylum     | Class     | Order       | Family        | Genus       | Species                       | Number of reads |    |
|------------|-----------|-------------|---------------|-------------|-------------------------------|-----------------|----|
| Arthropoda | Insecta   | Diptera     | Rhagionidae   | Rhagio      | <i>Rhagio mystaceus</i>       | 47              | 44 |
| Arthropoda | Insecta   | Lepidoptera | Geometridae   | Crocallis   | <i>Crocallis elinguarua</i>   | 0               | 41 |
| Arthropoda | Insecta   | Lepidoptera | Unassigned    | Unassigned  | Unassigned                    | 0               | 40 |
| Arthropoda | Insecta   | Lepidoptera | Erebidae      | Bleptina    | Unassigned                    | 4               | 38 |
| Arthropoda | Insecta   | Hemiptera   | Miridae       | Phylus      | <i>Phylus melanocephalus</i>  | 0               | 37 |
| Arthropoda | Insecta   | Lepidoptera | Geometridae   | Operophtera | <i>Operophtera fagata</i>     | 0               | 32 |
| Arthropoda | Insecta   | Lepidoptera | Geometridae   | Unassigned  | Unassigned                    | 28              | 31 |
| Arthropoda | Insecta   | Lepidoptera | Unassigned    | Unassigned  | Unassigned                    | 0               | 26 |
| Arthropoda | Insecta   | Lepidoptera | Geometridae   | Unassigned  | Unassigned                    | 0               | 25 |
| Arthropoda | Insecta   | Hymenoptera | Ichneumonidae | Hyposoter   | <i>Hyposoter inquinatus</i>   | 0               | 24 |
| Arthropoda | Insecta   | Lepidoptera | Geometridae   | Unassigned  | Unassigned                    | 0               | 24 |
| Arthropoda | Insecta   | Lepidoptera | Unassigned    | Unassigned  | Unassigned                    | 0               | 23 |
| Arthropoda | Insecta   | Lepidoptera | Geometridae   | Agriopis    | <i>Agriopis leucophaearia</i> | 0               | 20 |
| Arthropoda | Insecta   | Unassigned  | Unassigned    | Unassigned  | Unassigned                    | 0               | 20 |
| Arthropoda | Insecta   | Unassigned  | Unassigned    | Unassigned  | Unassigned                    | 0               | 20 |
| Arthropoda | Insecta   | Lepidoptera | Nolidae       | Pseudoips   | <i>Pseudoips prasinanus</i>   | 0               | 19 |
| Arthropoda | Insecta   | Lepidoptera | Unassigned    | Unassigned  | Unassigned                    | 0               | 19 |
| Arthropoda | Insecta   | Lepidoptera | Unassigned    | Unassigned  | Unassigned                    | 0               | 19 |
| Arthropoda | Insecta   | Lepidoptera | Noctuidae     | Unassigned  | Unassigned                    | 0               | 18 |
| Arthropoda | Insecta   | Lepidoptera | Unassigned    | Unassigned  | Unassigned                    | 2               | 18 |
| Arthropoda | Insecta   | Lepidoptera | Geometridae   | Euphyia     | <i>Euphyia mesembrina</i>     | 0               | 17 |
| Arthropoda | Insecta   | Unassigned  | Unassigned    | Unassigned  | Unassigned                    | 0               | 17 |
| Arthropoda | Insecta   | Lepidoptera | Unassigned    | Unassigned  | Unassigned                    | 0               | 17 |
| Arthropoda | Insecta   | Lepidoptera | Geometridae   | Unassigned  | Unassigned                    | 0               | 17 |
| Arthropoda | Insecta   | Lepidoptera | Noctuidae     | Lithophane  | Unassigned                    | 3               | 17 |
| Arthropoda | Insecta   | Lepidoptera | Unassigned    | Unassigned  | Unassigned                    | 0               | 16 |
| Arthropoda | Insecta   | Lepidoptera | Geometridae   | Unassigned  | Unassigned                    | 0               | 16 |
| Arthropoda | Insecta   | Lepidoptera | Unassigned    | Unassigned  | Unassigned                    | 0               | 15 |
| Arthropoda | Insecta   | Hemiptera   | Lachnidae     | Cinara      | <i>Cinara pruinosa</i>        | 2               | 14 |
| Arthropoda | Arachnida | Araneae     | Clubionidae   | Clubiona    | <i>Clubiona canadensis</i>    | 0               | 14 |
| Arthropoda | Arachnida | Araneae     | Philodromidae | Philodromus | <i>Philodromus rufus</i>      | 10              | 14 |
| Arthropoda | Insecta   | Lepidoptera | Geometridae   | Unassigned  | Unassigned                    | 0               | 14 |

| Phylum     | Class     | Order          | Family         | Genus      | Species                    | Number of reads |    |
|------------|-----------|----------------|----------------|------------|----------------------------|-----------------|----|
| Arthropoda | Insecta   | Lepidoptera    | Geometridae    | Unassigned | Unassigned                 | 0               | 13 |
| Arthropoda | Insecta   | Diptera        | Phoridae       | Unassigned | Unassigned                 | 0               | 13 |
| Arthropoda | Insecta   | Lepidoptera    | Unassigned     | Unassigned | Unassigned                 | 0               | 12 |
| Arthropoda | Insecta   | Lepidoptera    | Geometridae    | Unassigned | Unassigned                 | 0               | 12 |
| Arthropoda | Insecta   | Lepidoptera    | Geometridae    | Unassigned | Unassigned                 | 0               | 12 |
| Arthropoda | Insecta   | Lepidoptera    | Geometridae    | Unassigned | Unassigned                 | 0               | 12 |
| Arthropoda | Insecta   | Lepidoptera    | Tortricidae    | Epinotia   | <i>Epinotia trigonella</i> | 0               | 11 |
| Arthropoda | Insecta   | Lepidoptera    | Geometridae    | Hydriomena | <i>Hydriomena furcata</i>  | 0               | 11 |
| Arthropoda | Insecta   | Unassigned     | Unassigned     | Unassigned | Unassigned                 | 0               | 11 |
| Arthropoda | Insecta   | Lepidoptera    | Unassigned     | Unassigned | Unassigned                 | 0               | 11 |
| Arthropoda | Insecta   | Lepidoptera    | Unassigned     | Unassigned | Unassigned                 | 0               | 11 |
| Arthropoda | Insecta   | Lepidoptera    | Geometridae    | Unassigned | Unassigned                 | 0               | 11 |
| Arthropoda | Insecta   | Lepidoptera    | Geometridae    | Unassigned | Unassigned                 | 0               | 11 |
| Arthropoda | Insecta   | Lepidoptera    | Ypsolophidae   | Unassigned | Unassigned                 | 0               | 11 |
| Arthropoda | Insecta   | Lepidoptera    | Elachistidae   | Unassigned | Unassigned                 | 0               | 11 |
| Arthropoda | Insecta   | Lepidoptera    | Erebidae       | Unassigned | Unassigned                 | 0               | 11 |
| Arthropoda | Insecta   | Lepidoptera    | Unassigned     | Unassigned | Unassigned                 | 0               | 10 |
| Arthropoda | Insecta   | Lepidoptera    | Geometridae    | Unassigned | Unassigned                 | 0               | 10 |
| Arthropoda | Insecta   | Lepidoptera    | Erebidae       | Unassigned | Unassigned                 | 0               | 10 |
| Arthropoda | Insecta   | Lepidoptera    | Geometridae    | Unassigned | Unassigned                 | 0               | 10 |
| Arthropoda | Insecta   | Lepidoptera    | Unassigned     | Unassigned | Unassigned                 | 18              | 10 |
| Arthropoda | Insecta   | Diptera        | Tachinidae     | Oswaldia   | <i>Oswaldia muscaria</i>   | 0               | 9  |
| Arthropoda | Insecta   | Lepidoptera    | Unassigned     | Unassigned | Unassigned                 | 0               | 9  |
| Arthropoda | Insecta   | Lepidoptera    | Unassigned     | Unassigned | Unassigned                 | 0               | 9  |
| Arthropoda | Insecta   | Lepidoptera    | Oecophoridae   | Unassigned | Unassigned                 | 0               | 9  |
| Arthropoda | Insecta   | Lepidoptera    | Geometridae    | Unassigned | Unassigned                 | 1               | 9  |
| Arthropoda | Insecta   | Lepidoptera    | Gelechiidae    | Unassigned | Unassigned                 | 0               | 9  |
| Arthropoda | Insecta   | Lepidoptera    | Unassigned     | Unassigned | Unassigned                 | 0               | 9  |
| Arthropoda | Insecta   | Lepidoptera    | Noctuidae      | Orthosia   | Unassigned                 | 0               | 9  |
| Arthropoda | Arachnida | Sarcoptiformes | Parakalummidae | Unassigned | Unassigned                 | 11              | 9  |
| Arthropoda | Insecta   | Lepidoptera    | Unassigned     | Unassigned | Unassigned                 | 0               | 8  |
| Arthropoda | Insecta   | Lepidoptera    | Noctuidae      | Unassigned | Unassigned                 | 0               | 8  |

| Phylum     | Class     | Order       | Family       | Genus       | Species                       | Number of reads |   |
|------------|-----------|-------------|--------------|-------------|-------------------------------|-----------------|---|
| Arthropoda | Insecta   | Lepidoptera | Unassigned   | Unassigned  | Unassigned                    | 0               | 8 |
| Arthropoda | Arachnida | Araneae     | Unassigned   | Unassigned  | Unassigned                    | 2               | 8 |
| Arthropoda | Insecta   | Unassigned  | Unassigned   | Unassigned  | Unassigned                    | 0               | 7 |
| Arthropoda | Insecta   | Lepidoptera | Unassigned   | Unassigned  | Unassigned                    | 0               | 7 |
| Arthropoda | Insecta   | Lepidoptera | Unassigned   | Unassigned  | Unassigned                    | 0               | 7 |
| Arthropoda | Insecta   | Lepidoptera | Noctuidae    | Unassigned  | Unassigned                    | 0               | 7 |
| Arthropoda | Insecta   | Lepidoptera | Geometridae  | Unassigned  | Unassigned                    | 1               | 7 |
| Arthropoda | Insecta   | Lepidoptera | Geometridae  | Unassigned  | Unassigned                    | 0               | 7 |
| Arthropoda | Insecta   | Lepidoptera | Geometridae  | Unassigned  | Unassigned                    | 0               | 7 |
| Arthropoda | Insecta   | Lepidoptera | Geometridae  | Unassigned  | Unassigned                    | 0               | 7 |
| Arthropoda | Insecta   | Lepidoptera | Geometridae  | Erannis     | <i>Erannis defoliaria</i>     | 0               | 6 |
| Arthropoda | Insecta   | Lepidoptera | Geometridae  | Erannis     | <i>Erannis defoliaria</i>     | 0               | 6 |
| Arthropoda | Insecta   | Lepidoptera | Geometridae  | Erannis     | <i>Erannis defoliaria</i>     | 0               | 6 |
| Arthropoda | Insecta   | Lepidoptera | Geometridae  | Operophtera | <i>Operophtera brumata</i>    | 0               | 6 |
| Arthropoda | Insecta   | Lepidoptera | Unassigned   | Unassigned  | Unassigned                    | 0               | 6 |
| Arthropoda | Insecta   | Lepidoptera | Unassigned   | Unassigned  | Unassigned                    | 0               | 6 |
| Arthropoda | Insecta   | Lepidoptera | Unassigned   | Unassigned  | Unassigned                    | 0               | 6 |
| Arthropoda | Insecta   | Lepidoptera | Scythrididae | Unassigned  | Unassigned                    | 0               | 6 |
| Arthropoda | Insecta   | Lepidoptera | Noctuidae    | Unassigned  | Unassigned                    | 0               | 6 |
| Arthropoda | Insecta   | Lepidoptera | Unassigned   | Unassigned  | Unassigned                    | 0               | 6 |
| Arthropoda | Insecta   | Lepidoptera | Geometridae  | Unassigned  | Unassigned                    | 0               | 6 |
| Arthropoda | Insecta   | Lepidoptera | Geometridae  | Unassigned  | Unassigned                    | 0               | 6 |
| Arthropoda | Insecta   | Lepidoptera | Geometridae  | Operophtera | Unassigned                    | 0               | 6 |
| Arthropoda | Insecta   | Lepidoptera | Crambidae    | Eulepte     | Unassigned                    | 0               | 6 |
| Arthropoda | Insecta   | Lepidoptera | Geometridae  | Agriopis    | <i>Agriopis leucophaearia</i> | 0               | 5 |
| Arthropoda | Insecta   | Lepidoptera | Geometridae  | Agriopis    | <i>Agriopis leucophaearia</i> | 0               | 5 |
| Arthropoda | Insecta   | Lepidoptera | Tortricidae  | Argyroploce | <i>Argyroploce externa</i>    | 0               | 5 |
| Arthropoda | Insecta   | Lepidoptera | Sphingidae   | Clanis      | <i>Clanis pratti</i>          | 0               | 5 |
| Arthropoda | Insecta   | Diptera     | Tachinidae   | Cyzenis     | <i>Cyzenis albicans</i>       | 0               | 5 |
| Arthropoda | Insecta   | Lepidoptera | Geometridae  | Erannis     | <i>Erannis defoliaria</i>     | 0               | 5 |
| Arthropoda | Insecta   | Lepidoptera | Geometridae  | Operophtera | <i>Operophtera fagata</i>     | 0               | 5 |
| Arthropoda | Insecta   | Lepidoptera | Tortricidae  | Ptycholoma  | <i>Ptycholoma lecheana</i>    | 163             | 5 |

| Phylum       | Class      | Order       | Family        | Genus       | Species    | Number of reads |   |
|--------------|------------|-------------|---------------|-------------|------------|-----------------|---|
| Arthropoda   | Insecta    | Unassigned  | Unassigned    | Unassigned  | Unassigned | 0               | 5 |
| Arthropoda   | Insecta    | Unassigned  | Unassigned    | Unassigned  | Unassigned | 0               | 5 |
| Arthropoda   | Insecta    | Unassigned  | Unassigned    | Unassigned  | Unassigned | 0               | 5 |
| Arthropoda   | Insecta    | Lepidoptera | Unassigned    | Unassigned  | Unassigned | 0               | 5 |
| Arthropoda   | Insecta    | Lepidoptera | Unassigned    | Unassigned  | Unassigned | 0               | 5 |
| Arthropoda   | Insecta    | Lepidoptera | Unassigned    | Unassigned  | Unassigned | 0               | 5 |
| Arthropoda   | Insecta    | Lepidoptera | Unassigned    | Unassigned  | Unassigned | 0               | 5 |
| Arthropoda   | Insecta    | Hymenoptera | Unassigned    | Unassigned  | Unassigned | 0               | 5 |
| Arthropoda   | Insecta    | Lepidoptera | Unassigned    | Unassigned  | Unassigned | 0               | 5 |
| Arthropoda   | Insecta    | Lepidoptera | Unassigned    | Unassigned  | Unassigned | 0               | 5 |
| Arthropoda   | Insecta    | Lepidoptera | Unassigned    | Unassigned  | Unassigned | 0               | 5 |
| Arthropoda   | Insecta    | Lepidoptera | Crambidae     | Unassigned  | Unassigned | 0               | 5 |
| Arthropoda   | Insecta    | Lepidoptera | Geometridae   | Unassigned  | Unassigned | 0               | 5 |
| Arthropoda   | Insecta    | Lepidoptera | Unassigned    | Unassigned  | Unassigned | 0               | 5 |
| Arthropoda   | Insecta    | Lepidoptera | Drepanidae    | Unassigned  | Unassigned | 0               | 5 |
| Arthropoda   | Insecta    | Lepidoptera | Unassigned    | Unassigned  | Unassigned | 0               | 5 |
| Arthropoda   | Insecta    | Lepidoptera | Noctuidae     | Unassigned  | Unassigned | 1               | 5 |
| Arthropoda   | Insecta    | Lepidoptera | Geometridae   | Unassigned  | Unassigned | 0               | 5 |
| Arthropoda   | Insecta    | Lepidoptera | Geometridae   | Unassigned  | Unassigned | 0               | 5 |
| Arthropoda   | Insecta    | Lepidoptera | Unassigned    | Unassigned  | Unassigned | 0               | 5 |
| Arthropoda   | Insecta    | Lepidoptera | Geometridae   | Unassigned  | Unassigned | 0               | 5 |
| Arthropoda   | Arachnida  | Araneae     | Anyphaenidae  | Unassigned  | Unassigned | 0               | 5 |
| Arthropoda   | Insecta    | Lepidoptera | Geometridae   | Unassigned  | Unassigned | 0               | 5 |
| Arthropoda   | Insecta    | Lepidoptera | Geometridae   | Unassigned  | Unassigned | 0               | 5 |
| Arthropoda   | Insecta    | Lepidoptera | Geometridae   | Unassigned  | Unassigned | 0               | 5 |
| Arthropoda   | Insecta    | Lepidoptera | Geometridae   | Operophtera | Unassigned | 0               | 5 |
| Arthropoda   | Insecta    | Lepidoptera | Unassigned    | Unassigned  | Unassigned | 0               | 5 |
| Arthropoda   | Insecta    | Hymenoptera | Ichneumonidae | Chorinaeus  | Unassigned | 0               | 5 |
| Streptophyta | Unassigned | Unassigned  | Unassigned    | Unassigned  | Unassigned | 12              | 5 |
| Streptophyta | Unassigned | Unassigned  | Unassigned    | Unassigned  | Unassigned | 4               | 5 |
| Arthropoda   | Insecta    | Unassigned  | Unassigned    | Unassigned  | Unassigned | 4               | 4 |
| Arthropoda   | Arachnida  | Unassigned  | Unassigned    | Unassigned  | Unassigned | 4               | 4 |

| Phylum       | Class      | Order       | Family       | Genus      | Species                       | Number of reads |   |
|--------------|------------|-------------|--------------|------------|-------------------------------|-----------------|---|
| Arthropoda   | Insecta    | Unassigned  | Unassigned   | Unassigned | Unassigned                    | 3               | 4 |
| Arthropoda   | Insecta    | Lepidoptera | Unassigned   | Unassigned | Unassigned                    | 1               | 4 |
| Arthropoda   | Insecta    | Lepidoptera | Unassigned   | Unassigned | Unassigned                    | 4               | 4 |
| Streptophyta | Unassigned | Rosales     | Rosaceae     | Unassigned | Unassigned                    | 7               | 4 |
| Streptophyta | Unassigned | Rosales     | Rosaceae     | Unassigned | Unassigned                    | 6               | 4 |
| Arthropoda   | Insecta    | Lepidoptera | Pyrilidae    | Galleria   | <i>Galleria mellonella</i>    | 6               | 3 |
| Arthropoda   | Insecta    | Unassigned  | Unassigned   | Unassigned | Unassigned                    | 14              | 3 |
| Arthropoda   | Insecta    | Diptera     | Chironomidae | Unassigned | Unassigned                    | 2               | 3 |
| Arthropoda   | Insecta    | Lepidoptera | Noctuidae    | Catocala   | Unassigned                    | 2               | 3 |
| Arthropoda   | Insecta    | Lepidoptera | Geometridae  | Cladara    | Unassigned                    | 46              | 3 |
| Arthropoda   | Insecta    | Plecoptera  | Nemouridae   | Ostrocerca | Unassigned                    | 5               | 3 |
| Streptophyta | Unassigned | Rosales     | Rosaceae     | Unassigned | Unassigned                    | 3               | 3 |
| Arthropoda   | Insecta    | Lepidoptera | Noctuidae    | Amphipyra  | <i>Amphipyra pyramidoides</i> | 6               | 2 |
| Arthropoda   | Insecta    | Lepidoptera | Geometridae  | Unassigned | Unassigned                    | 7               | 2 |
| Arthropoda   | Insecta    | Lepidoptera | Noctuidae    | Unassigned | Unassigned                    | 0               | 2 |
| Streptophyta | Unassigned | Sapindales  | Unassigned   | Unassigned | Unassigned                    | 4               | 2 |
| Streptophyta | Unassigned | Fagales     | Fagaceae     | Unassigned | Unassigned                    | 4               | 2 |
| Arthropoda   | Insecta    | Lepidoptera | Tortricidae  | Hedya      | <i>Hedya nubiferana</i>       | 5135            | 1 |
| Arthropoda   | Insecta    | Lepidoptera | Noctuidae    | Orthosia   | <i>Orthosia incerta</i>       | 10              | 1 |
| Arthropoda   | Insecta    | Unassigned  | Unassigned   | Unassigned | Unassigned                    | 6               | 1 |
| Arthropoda   | Insecta    | Lepidoptera | Unassigned   | Unassigned | Unassigned                    | 5               | 1 |
| Arthropoda   | Insecta    | Diptera     | Unassigned   | Unassigned | Unassigned                    | 11              | 1 |
| Arthropoda   | Insecta    | Lepidoptera | Unassigned   | Unassigned | Unassigned                    | 4               | 1 |
| Arthropoda   | Insecta    | Coleoptera  | Unassigned   | Unassigned | Unassigned                    | 24              | 1 |
| Streptophyta | Unassigned | Unassigned  | Unassigned   | Unassigned | Unassigned                    | 7               | 1 |
| Streptophyta | Unassigned | Fagales     | Fagaceae     | Unassigned | Unassigned                    | 6               | 1 |
| Streptophyta | Unassigned | Unassigned  | Unassigned   | Unassigned | Unassigned                    | 3               | 1 |
| Streptophyta | Unassigned | Fagales     | Fagaceae     | Unassigned | Unassigned                    | 3               | 1 |
| Streptophyta | Unassigned | Fagales     | Fagaceae     | Unassigned | Unassigned                    | 3               | 1 |
| Streptophyta | Unassigned | Fagales     | Fagaceae     | Unassigned | Unassigned                    | 2               | 1 |
| Streptophyta | Unassigned | Rosales     | Rosaceae     | Docynia    | Unassigned                    | 2               | 1 |
| Streptophyta | Unassigned | Fagales     | Unassigned   | Unassigned | Unassigned                    | 1               | 1 |

| Phylum       | Class      | Order       | Family        | Genus         | Species                           | Number of reads |   |
|--------------|------------|-------------|---------------|---------------|-----------------------------------|-----------------|---|
| Streptophyta | Unassigned | Unassigned  | Unassigned    | Unassigned    | Unassigned                        | 1               | 1 |
| Streptophyta | Unassigned | Fagales     | Casuarinaceae | Gymnostoma    | Unassigned                        | 1               | 1 |
| Streptophyta | Unassigned | Fagales     | Fagaceae      | Unassigned    | Unassigned                        | 1               | 1 |
| Streptophyta | Unassigned | Fabales     | Fabaceae      | Unassigned    | Unassigned                        | 1               | 1 |
| Unassigned   | Unassigned | Unassigned  | Unassigned    | Unassigned    | Unassigned                        | 0               | 1 |
| Streptophyta | Unassigned | Fagales     | Fagaceae      | Unassigned    | Unassigned                        | 0               | 1 |
| Streptophyta | Unassigned | Myrtales    | Combretaceae  | Unassigned    | Unassigned                        | 0               | 1 |
| Streptophyta | Unassigned | Unassigned  | Unassigned    | Unassigned    | Unassigned                        | 0               | 1 |
| Streptophyta | Unassigned | Unassigned  | Unassigned    | Unassigned    | Unassigned                        | 0               | 1 |
| Streptophyta | Unassigned | Rosales     | Unassigned    | Unassigned    | Unassigned                        | 0               | 1 |
| Streptophyta | Unassigned | Unassigned  | Unassigned    | Unassigned    | Unassigned                        | 0               | 1 |
| Streptophyta | Unassigned | Fagales     | Fagaceae      | Unassigned    | Unassigned                        | 0               | 1 |
| Streptophyta | Unassigned | Unassigned  | Unassigned    | Unassigned    | Unassigned                        | 0               | 1 |
| Streptophyta | Unassigned | Fagales     | Unassigned    | Unassigned    | Unassigned                        | 0               | 1 |
| Streptophyta | Unassigned | Rosales     | Rosaceae      | Unassigned    | Unassigned                        | 0               | 1 |
| Streptophyta | Unassigned | Rosales     | Unassigned    | Unassigned    | Unassigned                        | 0               | 1 |
| Streptophyta | Unassigned | Unassigned  | Unassigned    | Unassigned    | Unassigned                        | 0               | 1 |
| Streptophyta | Unassigned | Fagales     | Fagaceae      | Unassigned    | Unassigned                        | 0               | 1 |
| Streptophyta | Unassigned | Fagales     | Fagaceae      | Unassigned    | Unassigned                        | 0               | 1 |
| Streptophyta | Unassigned | Unassigned  | Unassigned    | Unassigned    | Unassigned                        | 0               | 1 |
| Streptophyta | Unassigned | Rosales     | Rosaceae      | Unassigned    | Unassigned                        | 0               | 1 |
| Streptophyta | Unassigned | Fagales     | Fagaceae      | Unassigned    | Unassigned                        | 0               | 1 |
| Streptophyta | Unassigned | Fabales     | Fabaceae      | Unassigned    | Unassigned                        | 0               | 1 |
| Streptophyta | Unassigned | Fabales     | Fabaceae      | Unassigned    | Unassigned                        | 0               | 1 |
| Streptophyta | Unassigned | Unassigned  | Unassigned    | Unassigned    | Unassigned                        | 0               | 1 |
| Arthropoda   | Insecta    | Coleoptera  | Coccinellidae | Calvia        | <i>Calvia quatuordecimguttata</i> | 15              | 0 |
| Arthropoda   | Insecta    | Lepidoptera | Geometridae   | Campaea       | <i>Campaea margaritaria</i>       | 34              | 0 |
| Arthropoda   | Arachnida  | Araneae     | Clubionidae   | Clubiona      | <i>Clubiona comta</i>             | 15              | 0 |
| Arthropoda   | Insecta    | Lepidoptera | Geometridae   | Colotois      | <i>Colotois pennaria</i>          | 6               | 0 |
| Arthropoda   | Insecta    | Lepidoptera | Tortricidae   | Ditula        | <i>Ditula angustiorana</i>        | 22              | 0 |
| Arthropoda   | Insecta    | Hemiptera   | Aphididae     | Drepanosiphum | <i>Drepanosiphum platanoidis</i>  | 220             | 0 |
| Arthropoda   | Insecta    | Diptera     | Syrphidae     | Epistrophe    | <i>Epistrophe eligans</i>         | 6               | 0 |

| Phylum     | Class      | Order         | Family        | Genus       | Species                          | Number of reads |   |
|------------|------------|---------------|---------------|-------------|----------------------------------|-----------------|---|
| Arthropoda | Insecta    | Coleoptera    | Staphylinidae | Haploglossa | <i>Haploglossa villosula</i>     | 5               | 0 |
| Arthropoda | Insecta    | Lepidoptera   | Tortricidae   | Hedya       | <i>Hedya nubiferana</i>          | 6               | 0 |
| Arthropoda | Insecta    | Ephemeroptera | Ephemeridae   | Litobranca  | <i>Litobranca recurvata</i>      | 45              | 0 |
| Arthropoda | Insecta    | Lepidoptera   | Tortricidae   | Lorita      | <i>Lorita scarificata</i>        | 10              | 0 |
| Arthropoda | Insecta    | Lepidoptera   | Tortricidae   | Pandemis    | <i>Pandemis cinnamomeana</i>     | 20              | 0 |
| Arthropoda | Insecta    | Hemiptera     | Aphididae     | Periphyllus | <i>Periphyllus testudinaceus</i> | 5               | 0 |
| Arthropoda | Insecta    | Diptera       | Syrphidae     | Syrphus     | <i>Syrphus torvus</i>            | 12131           | 0 |
| Arthropoda | Insecta    | Unassigned    | Unassigned    | Unassigned  | Unassigned                       | 17              | 0 |
| Arthropoda | Unassigned | Unassigned    | Unassigned    | Unassigned  | Unassigned                       | 11              | 0 |
| Arthropoda | Insecta    | Unassigned    | Unassigned    | Unassigned  | Unassigned                       | 10              | 0 |
| Arthropoda | Insecta    | Unassigned    | Unassigned    | Unassigned  | Unassigned                       | 126             | 0 |
| Arthropoda | Insecta    | Unassigned    | Unassigned    | Unassigned  | Unassigned                       | 20              | 0 |
| Arthropoda | Insecta    | Unassigned    | Unassigned    | Unassigned  | Unassigned                       | 9               | 0 |
| Arthropoda | Insecta    | Unassigned    | Unassigned    | Unassigned  | Unassigned                       | 790             | 0 |
| Arthropoda | Insecta    | Unassigned    | Unassigned    | Unassigned  | Unassigned                       | 9               | 0 |
| Arthropoda | Insecta    | Diptera       | Unassigned    | Unassigned  | Unassigned                       | 7               | 0 |
| Arthropoda | Insecta    | Diptera       | Unassigned    | Unassigned  | Unassigned                       | 21              | 0 |
| Arthropoda | Insecta    | Diptera       | Unassigned    | Unassigned  | Unassigned                       | 13              | 0 |
| Arthropoda | Insecta    | Lepidoptera   | Unassigned    | Unassigned  | Unassigned                       | 6               | 0 |
| Arthropoda | Insecta    | Lepidoptera   | Geometridae   | Unassigned  | Unassigned                       | 6               | 0 |
| Arthropoda | Insecta    | Diptera       | Syrphidae     | Unassigned  | Unassigned                       | 5               | 0 |
| Arthropoda | Insecta    | Lepidoptera   | Tortricidae   | Unassigned  | Unassigned                       | 9               | 0 |
| Arthropoda | Insecta    | Lepidoptera   | Pyalidae      | Unassigned  | Unassigned                       | 2               | 0 |
| Arthropoda | Insecta    | Lepidoptera   | Noctuidae     | Unassigned  | Unassigned                       | 7               | 0 |
| Arthropoda | Insecta    | Diptera       | Syrphidae     | Unassigned  | Unassigned                       | 5               | 0 |
| Arthropoda | Insecta    | Diptera       | Syrphidae     | Unassigned  | Unassigned                       | 5               | 0 |
| Arthropoda | Insecta    | Diptera       | Syrphidae     | Unassigned  | Unassigned                       | 2259            | 0 |
| Arthropoda | Insecta    | Diptera       | Syrphidae     | Unassigned  | Unassigned                       | 11              | 0 |
| Arthropoda | Insecta    | Diptera       | Syrphidae     | Syrphus     | Unassigned                       | 8290            | 0 |
| Arthropoda | Arachnida  | Araneae       | Philodromidae | Philodromus | Unassigned                       | 197             | 0 |
| Arthropoda | Insecta    | Diptera       | Unassigned    | Unassigned  | Unassigned                       | 84              | 0 |
| Arthropoda | Insecta    | Hymenoptera   | Ichneumonidae | Unassigned  | Unassigned                       | 42              | 0 |

| Phylum         | Class         | Order            | Family             | Genus         | Species                          | Number of reads |   |
|----------------|---------------|------------------|--------------------|---------------|----------------------------------|-----------------|---|
| Arthropoda     | Insecta       | Lepidoptera      | Geometridae        | Pasiphila     | Unassigned                       | 35              | 0 |
| Arthropoda     | Insecta       | Lepidoptera      | Unassigned         | Unassigned    | Unassigned                       | 19              | 0 |
| Arthropoda     | Insecta       | Hymenoptera      | Ichneumonidae      | Stictopisthus | Unassigned                       | 10              | 0 |
| Streptophyta   | Unassigned    | Picramniales     | Picramniaceae      | Alvaradoa     | <i>Alvaradoa amorphoides</i>     | 1               | 0 |
| Streptophyta   | Unassigned    | Fagales          | Fagaceae           | Castanopsis   | <i>Castanopsis boisii</i>        | 1               | 0 |
| Streptophyta   | Unassigned    | Santalales       | Aptandraceae       | Chaunochiton  | <i>Chaunochiton kappleri</i>     | 1               | 0 |
| Proteobacteria | Gammaproteoba | Enterobacterales | Enterobacteriaceae | Enterobacter  | <i>Enterobacter cancerogenus</i> | 1               | 0 |
| Streptophyta   | Unassigned    | Malvales         | Malvaceae          | Goethalsia    | <i>Goethalsia meiantha</i>       | 2               | 0 |
| Streptophyta   | Unassigned    | Fagales          | Fagaceae           | Lithocarpus   | <i>Lithocarpus nitidinix</i>     | 1               | 0 |
| Streptophyta   | Unassigned    | Sapindales       | Sapindaceae        | Unassigned    | Unassigned                       | 19173           | 0 |
| Streptophyta   | Unassigned    | Malvales         | Malvaceae          | Unassigned    | Unassigned                       | 586             | 0 |
| Streptophyta   | Unassigned    | Asterales        | Asteraceae         | Unassigned    | Unassigned                       | 454             | 0 |
| Streptophyta   | Unassigned    | Lamiales         | Lamiaceae          | Salvia        | Unassigned                       | 432             | 0 |
| Streptophyta   | Unassigned    | Sapindales       | Unassigned         | Unassigned    | Unassigned                       | 128             | 0 |
| Streptophyta   | Unassigned    | Rosales          | Unassigned         | Unassigned    | Unassigned                       | 92              | 0 |
| Streptophyta   | Unassigned    | Unassigned       | Unassigned         | Unassigned    | Unassigned                       | 70              | 0 |
| Streptophyta   | Unassigned    | Unassigned       | Unassigned         | Unassigned    | Unassigned                       | 65              | 0 |
| Streptophyta   | Unassigned    | Fagales          | Betulaceae         | Unassigned    | Unassigned                       | 49              | 0 |
| Streptophyta   | Unassigned    | Sapindales       | Unassigned         | Unassigned    | Unassigned                       | 47              | 0 |
| Streptophyta   | Unassigned    | Unassigned       | Unassigned         | Unassigned    | Unassigned                       | 38              | 0 |
| Streptophyta   | Unassigned    | Fabales          | Fabaceae           | Trifolium     | Unassigned                       | 30              | 0 |
| Streptophyta   | Unassigned    | Fabales          | Fabaceae           | Unassigned    | Unassigned                       | 19              | 0 |
| Streptophyta   | Unassigned    | Sapindales       | Sapindaceae        | Unassigned    | Unassigned                       | 17              | 0 |
| Streptophyta   | Unassigned    | Sapindales       | Sapindaceae        | Unassigned    | Unassigned                       | 14              | 0 |
| Streptophyta   | Unassigned    | Malpighiales     | Salicaceae         | Unassigned    | Unassigned                       | 11              | 0 |
| Streptophyta   | Unassigned    | Sapindales       | Sapindaceae        | Unassigned    | Unassigned                       | 9               | 0 |
| Streptophyta   | Unassigned    | Fagales          | Fagaceae           | Unassigned    | Unassigned                       | 9               | 0 |
| Streptophyta   | Unassigned    | Unassigned       | Unassigned         | Unassigned    | Unassigned                       | 6               | 0 |
| Streptophyta   | Unassigned    | Unassigned       | Unassigned         | Unassigned    | Unassigned                       | 6               | 0 |
| Streptophyta   | Unassigned    | Fagales          | Fagaceae           | Unassigned    | Unassigned                       | 6               | 0 |
| Streptophyta   | Unassigned    | Sapindales       | Sapindaceae        | Unassigned    | Unassigned                       | 5               | 0 |
| Streptophyta   | Unassigned    | Rosales          | Unassigned         | Unassigned    | Unassigned                       | 4               | 0 |



| Phylum       | Class      | Order      | Family      | Genus      | Species    | Number of reads |   |
|--------------|------------|------------|-------------|------------|------------|-----------------|---|
| Streptophyta | Unassigned | Sapindales | Unassigned  | Unassigned | Unassigned | 4               | 0 |
| Streptophyta | Unassigned | Sapindales | Unassigned  | Unassigned | Unassigned | 4               | 0 |
| Streptophyta | Unassigned | Fagales    | Fagaceae    | Unassigned | Unassigned | 4               | 0 |
| Streptophyta | Unassigned | Sapindales | Sapindaceae | Acer       | Unassigned | 4               | 0 |
| Streptophyta | Unassigned | Sapindales | Sapindaceae | Unassigned | Unassigned | 4               | 0 |
| Streptophyta | Unassigned | Fagales    | Fagaceae    | Unassigned | Unassigned | 4               | 0 |
| Streptophyta | Unassigned | Sapindales | Sapindaceae | Unassigned | Unassigned | 3               | 0 |
| Streptophyta | Unassigned | Unassigned | Unassigned  | Unassigned | Unassigned | 3               | 0 |
| Streptophyta | Unassigned | Rosales    | Rosaceae    | Unassigned | Unassigned | 3               | 0 |
| Streptophyta | Unassigned | Sapindales | Unassigned  | Unassigned | Unassigned | 3               | 0 |
| Streptophyta | Unassigned | Unassigned | Unassigned  | Unassigned | Unassigned | 3               | 0 |
| Streptophyta | Unassigned | Sapindales | Sapindaceae | Unassigned | Unassigned | 3               | 0 |
| Streptophyta | Unassigned | Fagales    | Fagaceae    | Unassigned | Unassigned | 3               | 0 |
| Streptophyta | Unassigned | Fagales    | Fagaceae    | Unassigned | Unassigned | 3               | 0 |
| Streptophyta | Unassigned | Fagales    | Fagaceae    | Unassigned | Unassigned | 3               | 0 |
| Streptophyta | Unassigned | Apiales    | Apiaceae    | Hansenia   | Unassigned | 2               | 0 |
| Streptophyta | Unassigned | Fagales    | Fagaceae    | Unassigned | Unassigned | 2               | 0 |
| Streptophyta | Unassigned | Rosales    | Rosaceae    | Unassigned | Unassigned | 2               | 0 |
| Streptophyta | Unassigned | Sapindales | Sapindaceae | Unassigned | Unassigned | 2               | 0 |
| Streptophyta | Unassigned | Unassigned | Unassigned  | Unassigned | Unassigned | 2               | 0 |
| Streptophyta | Unassigned | Unassigned | Unassigned  | Unassigned | Unassigned | 2               | 0 |
| Streptophyta | Unassigned | Unassigned | Unassigned  | Unassigned | Unassigned | 2               | 0 |
| Streptophyta | Unassigned | Sapindales | Sapindaceae | Unassigned | Unassigned | 2               | 0 |
| Streptophyta | Unassigned | Unassigned | Unassigned  | Unassigned | Unassigned | 2               | 0 |
| Streptophyta | Unassigned | Sapindales | Sapindaceae | Unassigned | Unassigned | 2               | 0 |
| Streptophyta | Unassigned | Sapindales | Sapindaceae | Unassigned | Unassigned | 2               | 0 |
| Streptophyta | Unassigned | Unassigned | Unassigned  | Unassigned | Unassigned | 2               | 0 |
| Streptophyta | Unassigned | Unassigned | Unassigned  | Unassigned | Unassigned | 2               | 0 |
| Streptophyta | Unassigned | Unassigned | Unassigned  | Unassigned | Unassigned | 2               | 0 |
| Streptophyta | Unassigned | Fagales    | Fagaceae    | Unassigned | Unassigned | 2               | 0 |
| Streptophyta | Unassigned | Unassigned | Unassigned  | Unassigned | Unassigned | 2               | 0 |
| Streptophyta | Unassigned | Fagales    | Fagaceae    | Unassigned | Unassigned | 2               | 0 |
| Streptophyta | Unassigned | Fagales    | Fagaceae    | Unassigned | Unassigned | 2               | 0 |

| Phylum         | Class      | Order        | Family       | Genus      | Species    | Number of reads |   |
|----------------|------------|--------------|--------------|------------|------------|-----------------|---|
| Streptophyta   | Unassigned | Sapindales   | Sapindaceae  | Unassigned | Unassigned | 2               | 0 |
| Proteobacteria | Unassigned | Unassigned   | Unassigned   | Unassigned | Unassigned | 2               | 0 |
| Streptophyta   | Unassigned | Apiales      | Apiaceae     | Unassigned | Unassigned | 1               | 0 |
| Streptophyta   | Unassigned | Boraginales  | Cordiaceae   | Unassigned | Unassigned | 1               | 0 |
| Streptophyta   | Unassigned | Unassigned   | Unassigned   | Unassigned | Unassigned | 1               | 0 |
| Streptophyta   | Unassigned | Boraginales  | Cordiaceae   | Unassigned | Unassigned | 1               | 0 |
| Streptophyta   | Unassigned | Asterales    | Asteraceae   | Unassigned | Unassigned | 1               | 0 |
| Streptophyta   | Unassigned | Asterales    | Asteraceae   | Unassigned | Unassigned | 1               | 0 |
| Streptophyta   | Unassigned | Lamiales     | Unassigned   | Unassigned | Unassigned | 1               | 0 |
| Streptophyta   | Unassigned | Sapindales   | Sapindaceae  | Unassigned | Unassigned | 1               | 0 |
| Streptophyta   | Unassigned | Unassigned   | Unassigned   | Unassigned | Unassigned | 1               | 0 |
| Streptophyta   | Unassigned | Unassigned   | Unassigned   | Unassigned | Unassigned | 1               | 0 |
| Streptophyta   | Liliopsida | Poales       | Poaceae      | Unassigned | Unassigned | 1               | 0 |
| Streptophyta   | Unassigned | Unassigned   | Unassigned   | Unassigned | Unassigned | 1               | 0 |
| Streptophyta   | Unassigned | Unassigned   | Unassigned   | Unassigned | Unassigned | 1               | 0 |
| Streptophyta   | Unassigned | Unassigned   | Unassigned   | Unassigned | Unassigned | 1               | 0 |
| Streptophyta   | Unassigned | Malpighiales | Trigoniaceae | Unassigned | Unassigned | 1               | 0 |
| Streptophyta   | Unassigned | Unassigned   | Unassigned   | Unassigned | Unassigned | 1               | 0 |
| Streptophyta   | Unassigned | Sapindales   | Sapindaceae  | Unassigned | Unassigned | 1               | 0 |
| Streptophyta   | Unassigned | Unassigned   | Unassigned   | Unassigned | Unassigned | 1               | 0 |
| Streptophyta   | Unassigned | Sapindales   | Sapindaceae  | Unassigned | Unassigned | 1               | 0 |
| Streptophyta   | Unassigned | Unassigned   | Unassigned   | Unassigned | Unassigned | 1               | 0 |
| Streptophyta   | Unassigned | Sapindales   | Sapindaceae  | Unassigned | Unassigned | 1               | 0 |
| Streptophyta   | Unassigned | Unassigned   | Unassigned   | Unassigned | Unassigned | 1               | 0 |
| Streptophyta   | Unassigned | Sapindales   | Sapindaceae  | Unassigned | Unassigned | 1               | 0 |
| Streptophyta   | Unassigned | Sapindales   | Unassigned   | Unassigned | Unassigned | 1               | 0 |
| Streptophyta   | Unassigned | Unassigned   | Unassigned   | Unassigned | Unassigned | 1               | 0 |
| Streptophyta   | Unassigned | Unassigned   | Unassigned   | Unassigned | Unassigned | 1               | 0 |
| Streptophyta   | Unassigned | Unassigned   | Unassigned   | Unassigned | Unassigned | 1               | 0 |
| Streptophyta   | Unassigned | Sapindales   | Sapindaceae  | Unassigned | Unassigned | 1               | 0 |
| Streptophyta   | Unassigned | Sapindales   | Sapindaceae  | Unassigned | Unassigned | 1               | 0 |









| Phylum       | Class      | Order      | Family        | Genus       | Species                    | Number of reads |   |
|--------------|------------|------------|---------------|-------------|----------------------------|-----------------|---|
| Streptophyta | Unassigned | Sapindales | Sapindaceae   | Unassigned  | Unassigned                 | 1               | 0 |
| Streptophyta | Unassigned | Unassigned | Unassigned    | Unassigned  | Unassigned                 | 1               | 0 |
| Streptophyta | Unassigned | Unassigned | Unassigned    | Unassigned  | Unassigned                 | 1               | 0 |
| Streptophyta | Unassigned | Fagales    | Fagaceae      | Unassigned  | Unassigned                 | 1               | 0 |
| Streptophyta | Unassigned | Fagales    | Fagaceae      | Unassigned  | Unassigned                 | 1               | 0 |
| Streptophyta | Unassigned | Fagales    | Unassigned    | Unassigned  | Unassigned                 | 1               | 0 |
| Streptophyta | Unassigned | Fabales    | Fabaceae      | Pterocarpus | <i>Pterocarpus indicus</i> | 1               | 0 |
| Streptophyta | Unassigned | Sapindales | Anacardiaceae | Rhus        | <i>Rhus chinensis</i>      | 4               | 0 |
| Streptophyta | Unassigned | Rosales    | Rosaceae      | Rubus       | <i>Rubus idaeus</i>        | 1               | 0 |
| Streptophyta | Unassigned | Sapindales | Sapindaceae   | Ungnadia    | <i>Ungnadia speciosa</i>   | 1               | 0 |
